# Supplementary material for: Hydrothermal synthesis and adsorption behavior of H4Ti5O12 nanorods along [100] as lithium ion-sieves
Source: Royal Society of Chemistry journal article supplement (doi:10.1039/d0ra05094f), 2020-01-01
Supplement: d0ra05094f1.pdf [file d0ra05094f1.pdf]

## Hydrothermal synthesis and adsorption behavior of $\text{H}_4\text{Ti}_5\text{O}_{12}$ nanorods along [100] as lithium ion-sieves

Bing Zhao,<sup>a,b,c</sup> Min Guo,<sup>\*a,b</sup> Fangren Qian,<sup>a,b,c</sup> Zhiqiang Qian,<sup>a,b</sup> Naicai Xu,<sup>d</sup> Zhijian Wu,<sup>a,b</sup> and Zhong Liu<sup>\*a,b</sup>

<sup>a</sup> Key Laboratory of Comprehensive and Highly Efficient Utilization of Salt Lake Resources, Qinghai Institute of Salt Lakes, Chinese Academy of Sciences, Xining 810008, China

<sup>b</sup> Key Laboratory of Salt Lake Resources Chemistry of Qinghai Province, Xining 810008, China

<sup>c</sup> University of Chinese Academy of Sciences, Beijing 100049, China

<sup>d</sup> School of Chemistry and Chemical Engineering, Qinghai Normal University, Xining 810008, China

### 1. Effect of second hydrothermal temperature on the nanorod morphology.

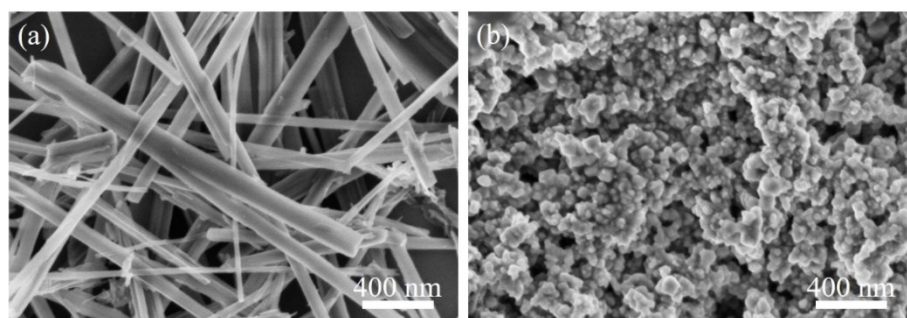

**Fig. S1.** SEM images of titanium oxides obtained at (a) 95°C and (b) 120°C for 24 h in the second hydrothermal process.

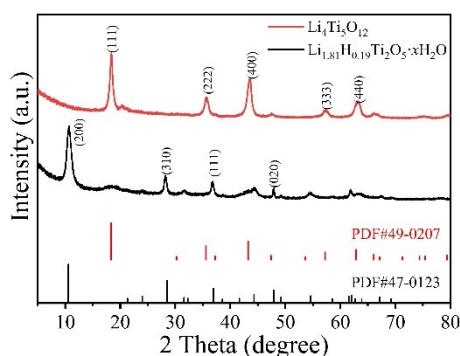

**Fig. S2.** The XRD patterns of lithium titanium oxides obtained from different treatment process.  $\text{Li}_{1.81}\text{H}_{0.19}\text{Ti}_2\text{O}_5 \cdot x\text{H}_2\text{O}$  and  $\text{Li}_4\text{Ti}_5\text{O}_{12}$ .

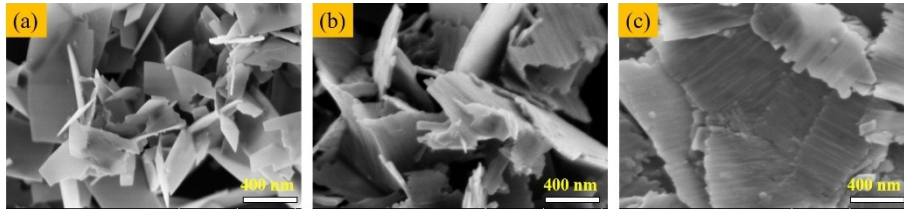

**Fig. S3.** Low-magnification SEM images of synthesized products: (a)  $\text{Li}_{1.81}\text{H}_{0.19}\text{Ti}_2\text{O}_5 \cdot x\text{H}_2\text{O}$  nanosheets (b)  $\text{Li}_4\text{T}_5\text{O}_{12}$  nanosheets and (c)  $\text{H}_4\text{T}_5\text{O}_{12}$  nanosheets.

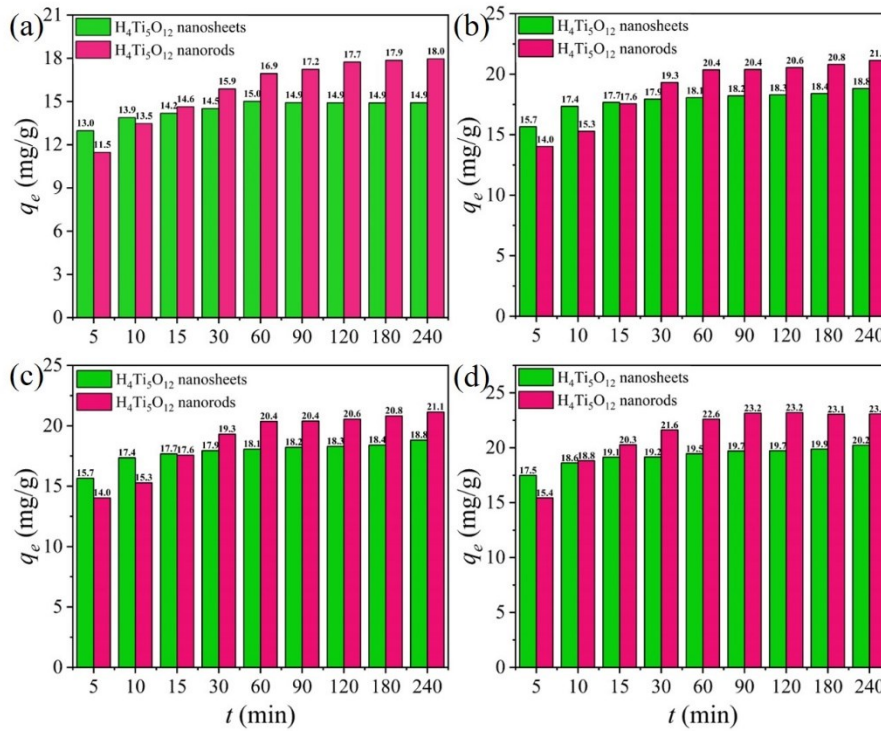

**Fig. S4.** The effect of LiCl concentrations and adsorption temperatures on the  $\text{Li}^+$  adsorption by different shapes of  $\text{H}_4\text{Ti}_5\text{O}_{12}$ . (a)  $C_{\text{LiCl}} = 12 \text{ mM}, T = 25^\circ\text{C}$ , (b)  $C_{\text{LiCl}} = 24 \text{ mM}, T = 25^\circ\text{C}$ , (c)  $C_{\text{LiCl}} = 24 \text{ mM}, T = 25^\circ\text{C}$  and (d)  $C_{\text{LiCl}} = 36 \text{ mM}, T = 25^\circ\text{C}$ .

## 2. Effect of different adsorption temperatures on the $\text{Li}^+$ adsorption

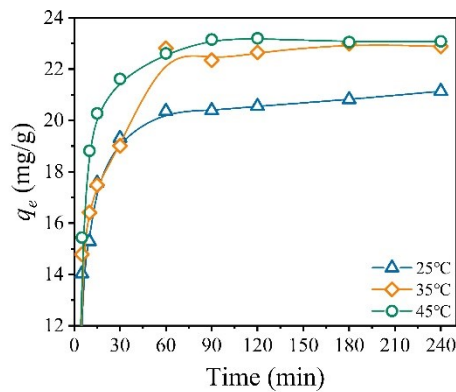

**Fig. S5.** The adsorption capacities at different adsorption temperatures. (adsorbent: 0.1 g, LiCl)

concentration: 24mM, volume: 50 mL, shaking speed: 150 rpm, pH value: 13).

### 3. Effect of LiCl concentrations on the Li<sup>+</sup> adsorption

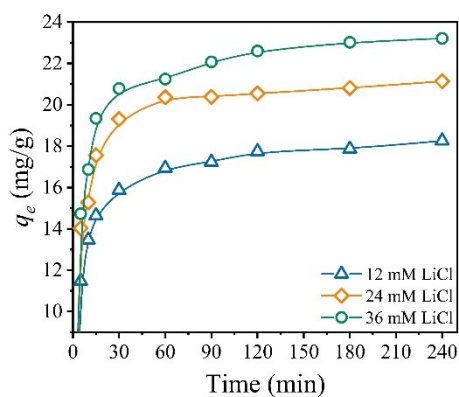

**Fig. S6.** The adsorption capacities at different LiCl concentrations. (adsorbent: 0.1 g, volume: 50 mL, shaking speed: 150 rpm, temperature: 25°C, pH value: 13).

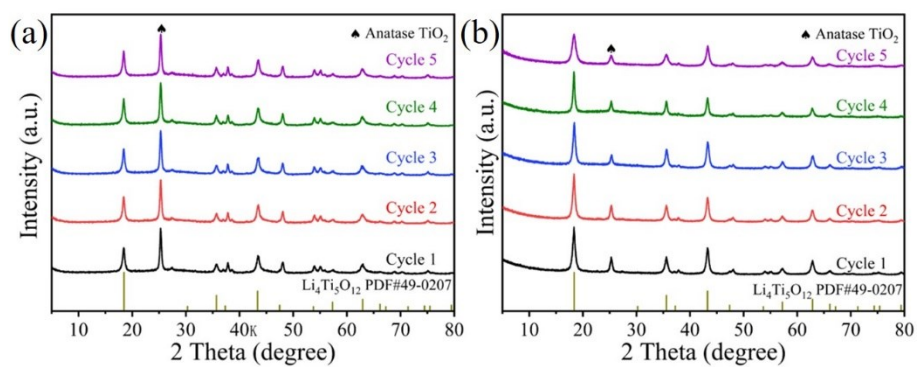

**Fig. S7.** in revised supporting information. The XRD patterns of (a) H<sub>4</sub>Ti<sub>5</sub>O<sub>12</sub> and (b) r-Li<sub>4</sub>Ti<sub>5</sub>O<sub>12</sub> obtained from each cycle.
